# Supplementary material for: Functional Characterization of Entamoeba histolytica Argonaute Proteins Reveals a Repetitive DR-Rich Motif Region That Controls Nuclear Localization
Source: PubMed Central journal article supplement (PMC6796981; doi:10.1128/msphere.00580-19), 2019-10-16
Supplement: mSphere.00580-19-sf003.pdf [file mSphere.00580-19-sf003.pdf]

# Suppl. Fig. 3

CLUSTAL O(1.2.4) multiple sequence alignment

```
Hs_HIWI      ETVLDFMFNFYHQTEEHKFQEQVSKELIGLVVLTKYNNKTYRVD DIDWDQNP KSTFKKAD
Dm_PIWI      ETIYDIMRRC SHNP--ARHQDEV RVNVLDLIVLTDYNNRTYRINDVDFGQTPKSTFS-CK
Eh_Ago2-1    -----QFMENKGVEQIKFEFKPMSLFNSLTKKLVKIDSIDFSKTPLHTFKLKD
Eh_Ago2-2    -----YLDSIRSKDQDTIKKEFQPMVLYNSQTKRLEKID DIDFGKNPSFSFTRKD
Eh_Ago2-3    -----LEESKEYSYDEIAIKFRPSWYYNEVSKQLEWIDEVKMNVTPDSQKFFWG
              :      : :  :.      ..  :::  :::. . . *
```

```
Hs_HIWI      GSEVSFLEYYRKQYNQEIT-DLKQPVLVSQP KRRRGPG-GTLP GPAMLIPELCYLTG
Dm_PIWI      GRDISFVEYYLT KYNIRIR-DHNQPLLISKNRDKA-LK-TNASELVVLIPELCRVTG
Eh_Ago2-1    GKEISFIDYYKSKYGVIIK-NTEQPLL VQNNPFFNENN--NSNEFSYFIPEFMYMTG
Eh_Ago2-2    GSSVSIAEYYKQRYQIEIR-DMDQPLL VQKKIEKDSEGKEVEKQPCYFVP-----
Eh_Ago2-3    DQEVSVSQYYMQRYGGAVHFDPNQFLMVQKQRKFG-----RIEYAYYVPQLMHRV-
. . : * . : * * : * : : . * : : : : : *
      ▲▲
```
