# Supplementary material for: Functional Characterization of Entamoeba histolytica Argonaute Proteins Reveals a Repetitive DR-Rich Motif Region That Controls Nuclear Localization
Source: PubMed Central journal article supplement (PMC6796981; doi:10.1128/msphere.00580-19), 2019-10-16

# Suppl. Fig. 6

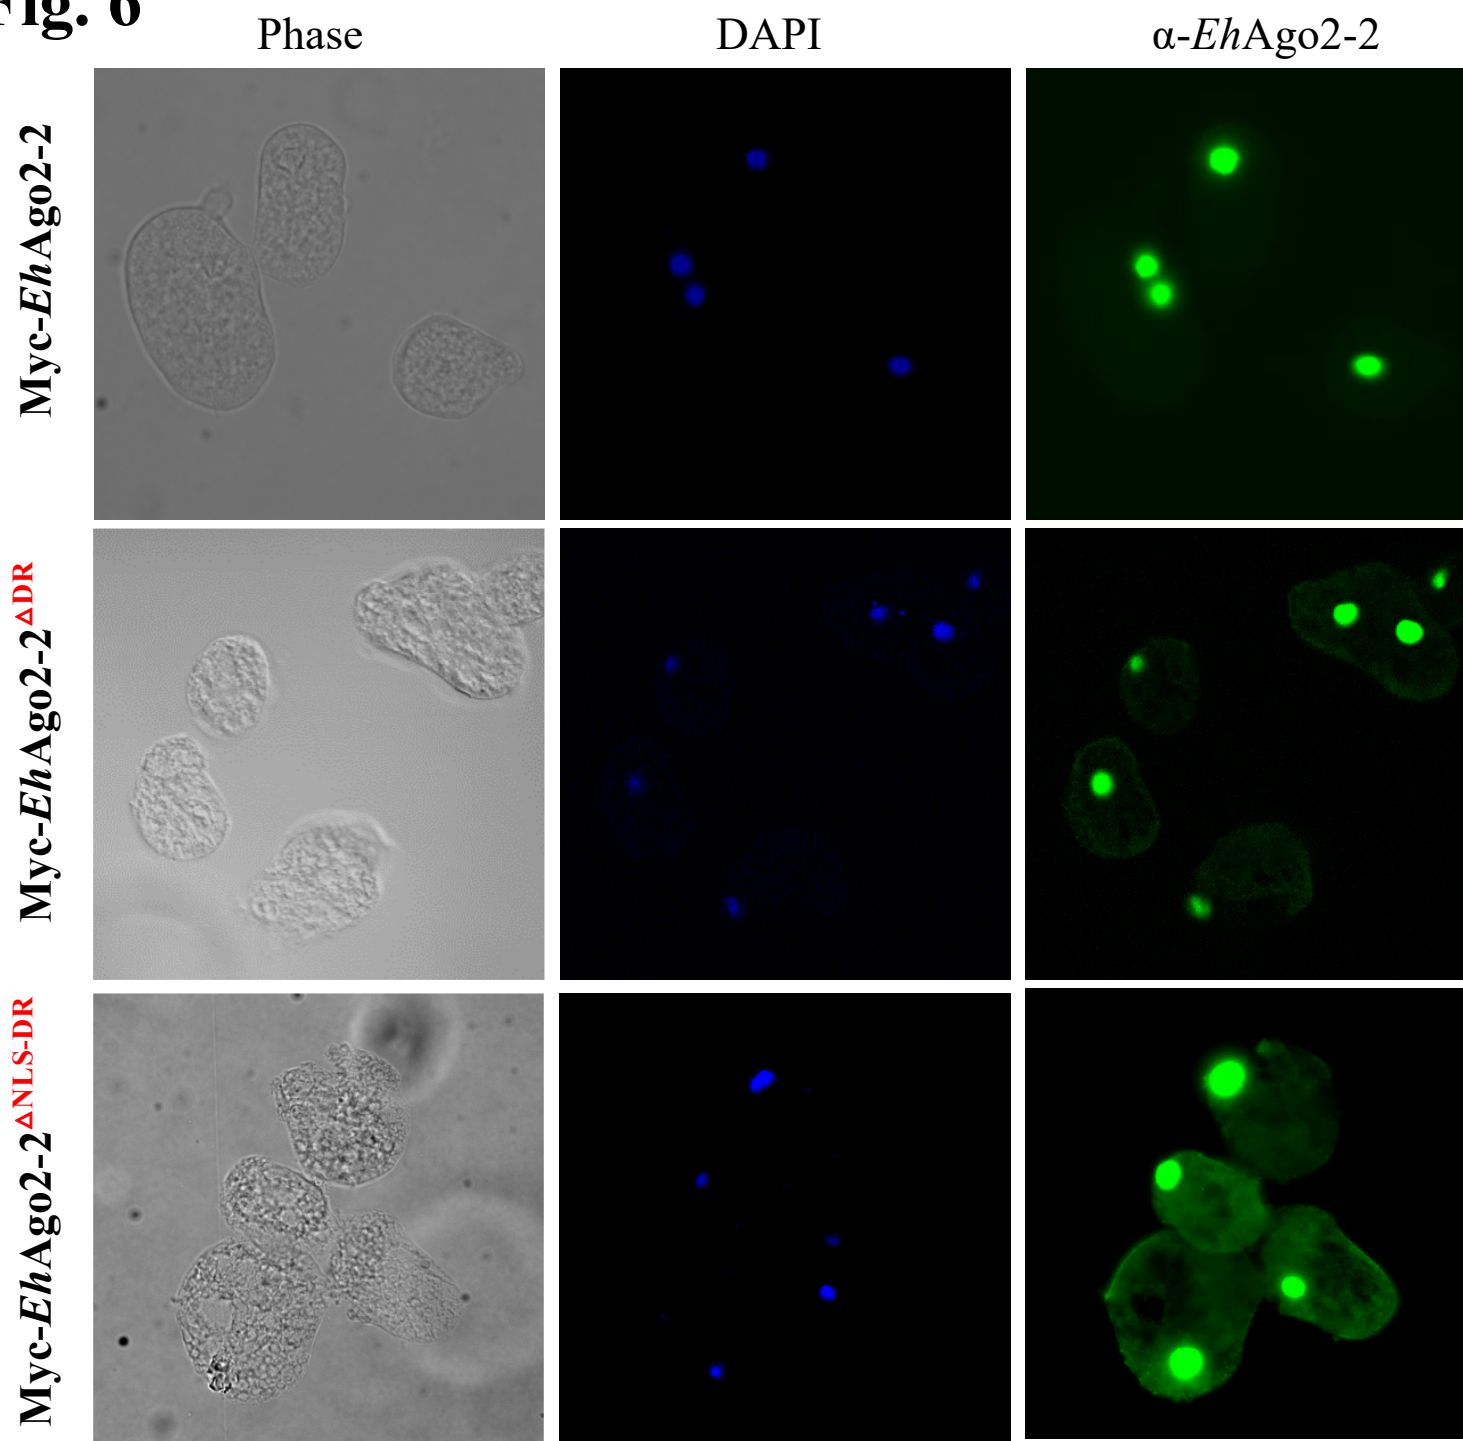

Supplement: mSphere.00580-19-sf006.pdf [file mSphere.00580-19-sf006.pdf]
