# Supplementary material for: Functional Characterization of Entamoeba histolytica Argonaute Proteins Reveals a Repetitive DR-Rich Motif Region That Controls Nuclear Localization
Source: PubMed Central journal article supplement (PMC6796981; doi:10.1128/msphere.00580-19), 2019-10-16
Supplement: mSphere.00580-19-st001.pdf [file mSphere.00580-19-st001.pdf]

**Suppl. Table I** All oligonucleotides used in this study are listed

| Primer name           | Sequence                                             |
|-----------------------|------------------------------------------------------|
| Ago2-1 Sma I Fwd      | CCCGGGATGTTAAGTATTTATCC                              |
| Ago2-1 XhoI Rvs       | CTCGAGTTAATAATAAGGATGTGAAC                           |
| Ago2-3 SmaI Fwd       | CCCGGGATGAAACAAGTTGGAG                               |
| Ago2-3 XhoI Rvs       | CTCGAGTTAATTCATTAGTTCTTC                             |
| Ago2-1 GA Fwd         | GCTCTAAGAAAAAGCCCGGGATGTTAAGTATTTATCCAATTAAT         |
| Ago2-1 GA Rvs         | GAAGAGTTCAACTCGAGTTAATAATAAGGATGTGAACTAATA           |
| Ago2-1 AA Fwd         | ATATCATTATAGATGCTGCTAAGTCAAAGTACGGA                  |
| Ago2-1 AA Rvs         | TCCGTACTIONTACTTAGCAGCATCTATAAATGATAT                |
| Ago2-3 GA Fwd         | GCTCTAAGAAAAAGCCCGGGATGAAACAAGTTGGAGTATTAAGAGA       |
| Ago2-3 GA Rvs         | GAAGAGTTCAACTCGAGTTAATTCATTAGTTCTTCAAGTAT            |
| Ago2-3 AA Fwd         | CTGGGGAGATCAGGAAGTTTCTGTTTCACAAGCTGCTATGCAACGGT      |
| Ago2-3 AA Rvs         | TTGTGAAACAGAACTTCCTGATCTCCCCAG                       |
| Ago2-2 GA Fwd         | GCTCTAAGAAAAAGCCCGGGATGCAACCATCAATTCACGATTACTTCT     |
| Ago2-2 GA Rvs         | GAAGAGTTCAACTCGAGTTAGTGATGATGATCTCTATCATCTCTT        |
| Ago2-2 AA Fwd         | ACTCGTAAAGATGGAAGTTCTGTTTCTATTGCTGAAGCTGCTAAACAACGTT |
| Ago2-2 AA Rvs         | AACGTTGTTTAGCAGCTTCAGCAATAGAAACAGAACTTCCATCTTTACGAGT |
| Ago2-2 del-NLS-DR Rvs | CTCGAGTCAACCTTCAACATAC                               |
| Ago2-2 del-DR Rvs     | CTCGAGCTATCCTCCACCGAAGC                              |
| SmaI DHFR Fwd         | AACCCGGGATGATCAGTCTGATTGCGGCGTT                      |
| SmaI DHFR Rvs         | AACCCGGGCCGCTCCAGAATCTCAAAGCAATAG                    |
| Ago2-3 AvrII Rvs      | AACCTAGGATTCATTAGTTCTTCAAGTATTTTAGA                  |
| Ago2-2 AvrII Fwd      | GATTGTGGGTATGTTGAAGGTCCTAGGAAATCAAGTAGAGGAGGAAAT     |
| Ago2-2 AvrII Rvs      | ATTTCTCCTCTACTTGATTTCTTAGGACCTTCAACATACCCACAATC      |
| Ago2-2 D mut Fwd      | ACAGTTGGTATTGCTGTTATTTTACAG                          |
| Ago2-2 D mut Rvs      | TGCCTGCTGAAATAACAGCAATACCAACTGT                      |
| Ago2-2 N mut Fwd      | GTATCAAGCTGCTAAATTCTGTAAAATG                         |
| Ago2-2 N mut Rvs      | CATTTTACAGAATTTAGCAGCTTGATAC                         |
