# Supplementary material for: Functional Characterization of Entamoeba histolytica Argonaute Proteins Reveals a Repetitive DR-Rich Motif Region That Controls Nuclear Localization
Source: PubMed Central journal article supplement (PMC6796981; doi:10.1128/msphere.00580-19), 2019-10-16
Supplement: mSphere.00580-19-st002.pdf [file mSphere.00580-19-st002.pdf]

**Suppl. Table II** Listed are Pfam domain analysis results for proteins with RRDDR motif.

| <b>Pfam</b>     | <b>Accession</b> | <b>Number of domains</b> |
|-----------------|------------------|--------------------------|
| RPEL            | PF02755.15       | 147                      |
| PCI             | PF01399.27       | 52                       |
| Helicase_C      | PF00271.31       | 13                       |
| DEAD            | PF00270.29       | 12                       |
| PAH             | PF02671.21       | 12                       |
| Myb_DNA-binding | PF00249.31       | 8                        |
| FF              | PF01846.19       | 8                        |
| MORN            | PF02493.20       | 8                        |
| RRM_1           | PF00076.22       | 7                        |
| Piwi            | PF02171.17       | 7                        |
| PAZ             | PF02170.22       | 5                        |
| Sin3_corepress  | PF08295.12       | 4                        |
| Sin3a_C         | PF16879.5        | 4                        |
| KH_1            | PF00013.29       | 3                        |
| WW              | PF00397.26       | 3                        |
| S1              | PF00575.23       | 3                        |
| HA2             | PF04408.23       | 3                        |
| CTD_bind        | PF04818.13       | 3                        |
| COMPASS-Shg1    | PF05205.12       | 3                        |
| SH3_2           | PF07653.17       | 3                        |
| OB_NTP_bind     | PF07717.16       | 3                        |
| Tho2            | PF11262.8        | 3                        |
| Thoc2           | PF11732.8        | 3                        |
| AAA_33          | PF13671.6        | 3                        |
| THOC2_N         | PF16134.5        | 3                        |
| SF1-HH          | PF16275.5        | 3                        |
